# Supplementary material
Source: Springer Nature journal article supplement (https://www.springermedizin.de/resource/supplementary/12939_2010_174_MOESM2_ESM.pdf/9551648)
Supplement: MOESM2 [file 9551648]

---

**DETERMINATION OF SCOPING REVIEW QUESTION**

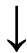

**BROAD SEARCH OF LITERATURE TO DETERMINE KEYWORDS**

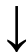

**DEVELOPMENT OF SEARCH STRATEGY**

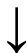

**SEARCH 18 DATABASES USING KEYWORDS**

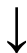

**IDENTIFICATION OF ARTICLES FOR TITLE AND ABSTRACT REVIEW**

115 articles and reports and 176 media pieces sourced from 18 databases  
(minus duplicates)

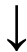

**INDEPENDENT REVIEW OF TITLES AND ABSTRACTS**

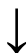

**TITLE AND ABSTRACT REVIEW MEETINGS**

91 articles and reports and 176 media pieces selected for full review

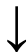

**INDEPENDENT ARTICLE REVIEW**

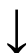

**IDENTIFICATION OF ADDITIONAL ARTICLES THROUGH HAND SEARCHING**

reference lists of reviewed articles and reports were hand searched for new sources  
57 new pieces reviewed in full

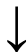

**INDEPENDENT ARTICLE REVIEW**

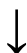

**ARTICLE REVIEW MEETINGS**

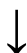

**OUTCOME**

203 sources accepted for review

---
